# Supplementary material
Source: publisher figshare collection journal article supplement (https://acs.figshare.com/ndownloader/files/4568563)
Supplement: Supplementary file 1 [file 4568563]

204.99
288.34
348.44
238.26
271.36
186.23
206.21
274.39
155.84
305.5
272.96
186.54
289.89
349.4
239.98
253.95
274.29
254.11
220.96
254.27
324.19
221.05
254.44
88.32
221.15
254.62
88.194
202.47
149.73
173.74
187.09
291.11
426.65
300.27
156.5
393.58
159.14
257.46
221.26
240.61
324.51
293.07
281.64
317.22
369.95
354.07
393.06
516.61
438.87
281.01
279.07
294.61
254.8
275.53
360.87
279.7
268.12
207.82
223.15
187.22
221.37
254.99
88.251
123.68
324.83
187.36
291.63
208.57
297.77
264.26
225.1
241.8
190.55
290.38
290.38
159.06
257.87
174.5
271.14
223.59
298.27
221.49
293.86
281.55
290.38
255.19
290.38
269.09
88.358
240.33
221.24
187.5
221.62
88.484
303.23
378.64
325.24
187.65
193.87
221.75
88.61
352.37
88.668
282.56
161.49
184.81
187.79
173.24
184.45
221.6
193.75
292.39
262.87
277.11
301.02
297.95
348.91
238.27
241.07
258.45
292.35
325.79
214.14
156.84
192.02
396.2
273.2
344.65
204.37
165.89
151.91
187.97
258.42
273.2
333.95
258.45
195.73
221.89
325.51
281.11
344.44
390.92
377.82
462.76
252.82
282.56
231.53
292.35
116.3
303.14
200.18
361.15
171.11
589.8
208.5
183.65
276.76
228.72
168.81
187.94
283.22
222.03
188.09
219.53
222.17
188.24
88.864
188.39
209.16
293.57
303.56
157.19
343.73
195.54
361.32
256.92
277.95
169.13
293.81
242.98
259.42
273.52
376.64
464.26
303.75
278.2
188.57
257.16
353.14
188.68
257.36
188.83
304.54
157.57
196.11
242.78
257.59
279.09
361.68
222.76
257.82
223.21
258.06
174.35
294.96
244.75
378.31
466.62
305.02
258.29
279.58
223.51
223.66
258.58
169.4
174.67
295.4
305.6
157.97
196.63
223.8
243.66
326.24
258.76
362.37
209.77
258.99
175.07
210.36
295.9
246.4
468.89
306.2
259.24
280.17
188.97
223.94
169.74
189.11
210.73
296.13
306.46
197.11
224.08
244.68
329.88
280.82
189.25
224.22
189.97
224.36
190.08
224.49
190.17
224.61
175.83
210.92
259.46
282.12
306.5
307.04
347.95
314.55
197.61
224.73
331.3
259.7
599.13
355.41
332.52
232.92
366.07
158.07
333.53
260.01
281.13
233.28
367.49
281.9
199.33
334.38
282.85
233.88
368.84
176.57
211.54
351.22
320.2
335.2
307.44
610.37
212.18
263.28
278.07
336.1
385.79
472.35
100.22
307.75
261.54
283.52
337.24
275.36
308.89
288.35
271.44
377.13
88.878
338.75
190.26
88.789
222.42
224.85
262.74
88.707
224.97
190.35
170.19
190.35
212.26
353.66
283.76
223.68
357.94
190.5
225.08
263.66
190.57
225.18
263.98
190.63
225.28
284.29
170.8
190.68
267.4
177.05
212.9
297.69
249.7
264.29
278.65
387.43
473.93
309.68
265.11
284.78
225.48
212.96
190.83
177.21
213.13
298.48
311.35
159.82
213.62
265.51
359.98
214.02
197.15
177.72
214.24
298.81
251.43
266.33
280.73
389.52
477.92
226.87
160.99
199.93
340.73
311.96
285.22
234.76
370.11
214.36
266.14
286.09
214.89
198.45
178.08
215.73
301.8
255.22
267.36
282.5
390.27
480.47
315.49
267.04
287.87
271.46
287.3
311.29
297.97
187.96
304.82
279.46
